# Supplementary material for: GPR97 triggers inflammatory processes in human neutrophils via a macromolecular complex upstream of PAR2 activation
Source: PubMed Central journal article supplement (PMC9613636; doi:10.1038/s41467-022-34083-1), 2022-10-27
Supplement: 41467_2022_34083_MOESM1_ESM.pdf [file 41467_2022_34083_MOESM1_ESM.pdf]

## **Supplementary Information**

### **GPR97 triggers inflammatory processes in human neutrophils via a macromolecular complex upstream of PAR2 activation**

Chu et al. 2022

**Supplementary Figure 1: GPR97<sup>E</sup>-mFc induces neutrophil activation by interacting with a putative GPR97-ligand expressed in a distinct human neutrophil subpopulation.**

**Supplementary Figure 2: Identification of mPR3 as the GPR97-specific binding partner on human neutrophils.**

**Supplementary Figure 3: GPR97 is a positive allosteric effector of neutrophil mPR3.**

**Supplementary Figure 4: Crystallographic studies of GPR97-ECR.**

**Supplementary Figure 5: The NTD is stabilised by hydrophobic interactions conserved in all GPR97 orthologs, but not found in other GAIN domains.**

**Supplementary Figure 6: Mapping of the mPR3-binding regions in GPR97-ECR.**

**Supplementary Figure 7: Expressional regulation of GPR97 and PAR2 in neutrophils.**

**Supplementary Figure 8: FcR-dependent up-regulated expression of GPR97 and PAR2 in neutrophils.**

**Supplementary Figure 9: Comparison of neutrophil activation phenotypes triggered by PAR2-specific agonists and GPR97<sup>E</sup>-mFc.**

**Supplementary Figure 10: FACS strategy of gating human neutrophil leukocytes from blood samples.**

**Supplementary Table 1: Antibody list**

**Supplementary Table 2: Cell line list**

**Supplementary Table 3: Primer list**

**Supplementary Table 4: Crystallographic statistics of GPR97-ECR.**

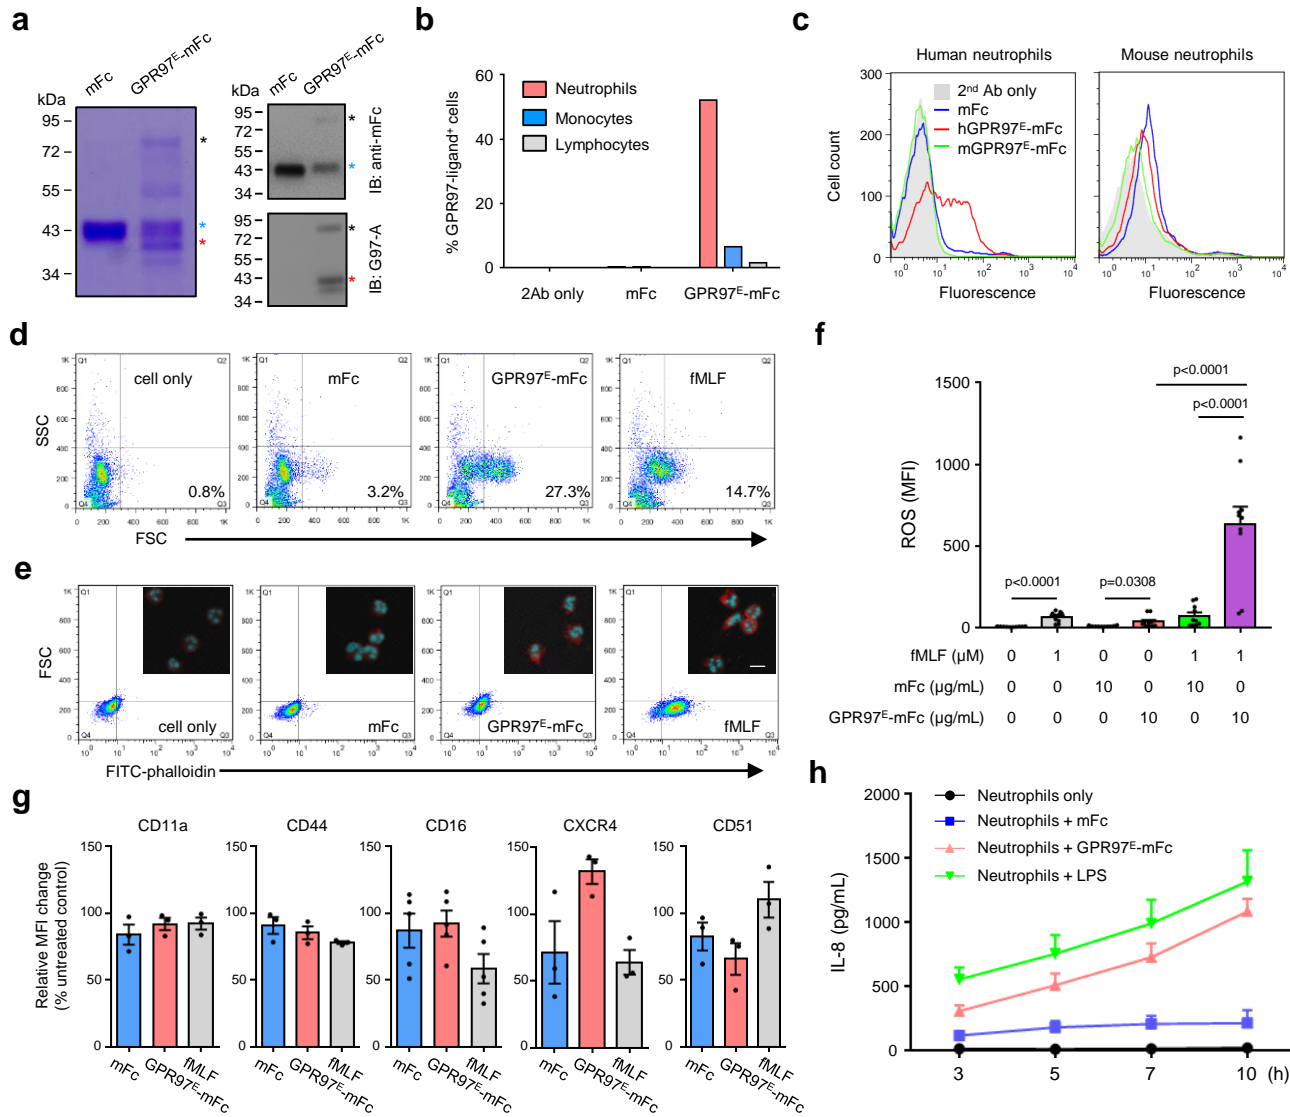

**Supplementary Fig. 1** GPR97<sup>E</sup>-mFc induces neutrophil activation by interacting with a putative GPR97-ligand expressed in a distinct human neutrophil subpopulation. **a.** Biochemical analyses of GPR97<sup>E</sup>-mFc protein by coomassie blue staining in SDS-PAGE gels (left panel) and by western blotting (right panels). Left panel: the molecular weight of GPR97-NTF is ~40 kDa (indicated by red asterisk), similar to the size of mFc (blue asterisk). A minor fraction of ~82 kDa un-cleaved GPR97<sup>E</sup>-mFc (black asterisk) was also expressed. The mFc-only protein was included as a control. Right panels: Western blot analyses of GPR97<sup>E</sup>-mFc using Abs specific to mFc (top) and to GPR97-ECR (G97-A mAb)(bottom), respectively. Experiments were repeated 3 times with similar results. **b.** Flow cytometry analyses of GPR97-ligand<sup>+</sup> cells in different blood cell populations as indicated. Data shown are the results of one representative of at least 10 independent experiments with similar results. **c.** Human neutrophil-specific feature of the GPR97-ligand interaction. FACS-based ligand-binding assays were performed in purified human and mouse neutrophils using human and mouse GPR97<sup>E</sup>-mFc probes as indicated. **d, e.** Morphological changes of neutrophils induced by GPR97<sup>E</sup>-mFc were detected by flow cytometry analyses either shown as FSC/SSC plots (**d**) or FSC/F-actin staining (**e**). Photos within (**e**) were fluorescence images of cells stained with FITC-phalloidin. Scale bar, 20  $\mu$ m. **f, g.** FACS analyses of ROS production (n = 5 independent experiments) (**f**) and expression of defined CD markers (CD16 n = 5, others n = 3 independent experiments) (**g**) in neutrophils treated as indicated. **h.** Time-dependent IL-8 production of neutrophils treated as indicated. (n = 3 independent experiments). Data in **f-h** are presented as means  $\pm$  SEM. P value was determined by one-way ANOVA. Source data are provided in the Source Data file.

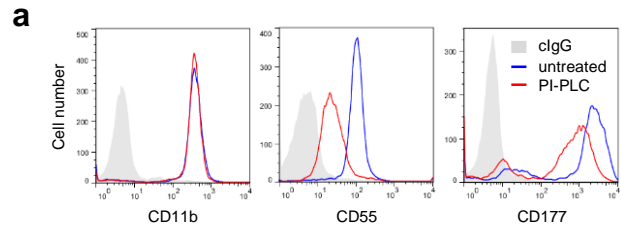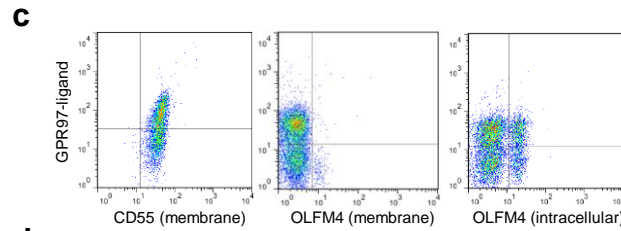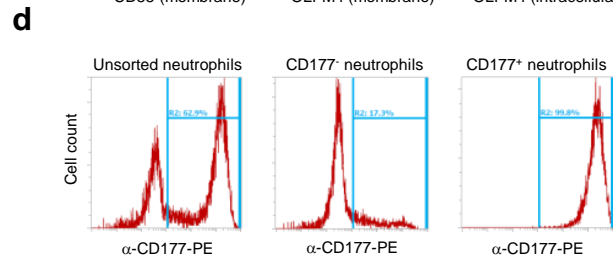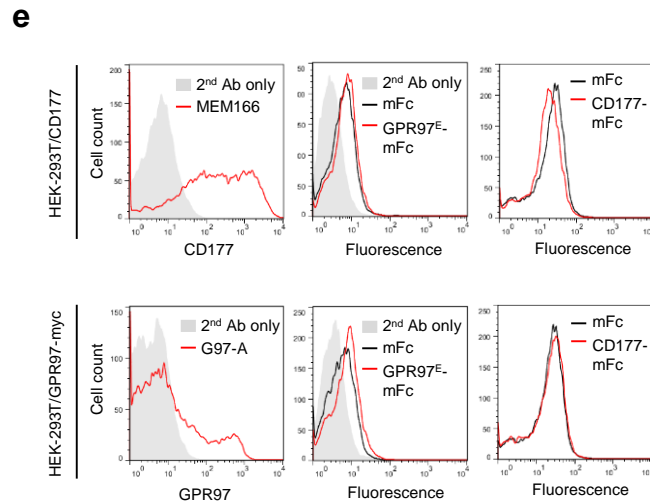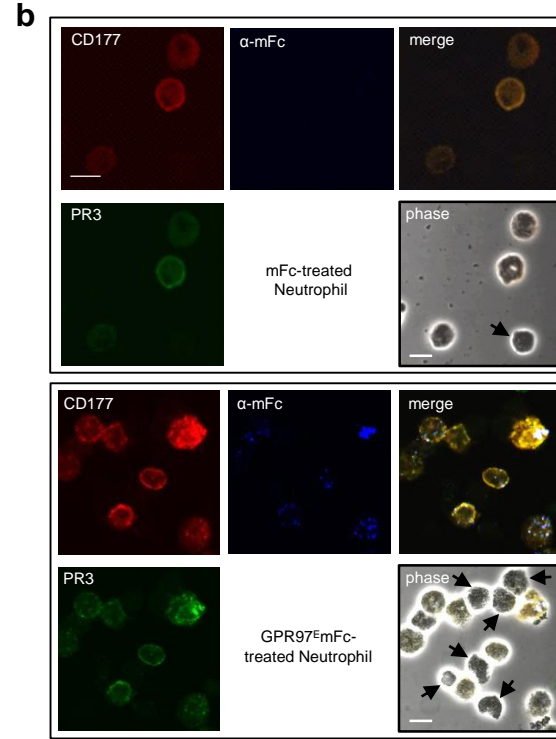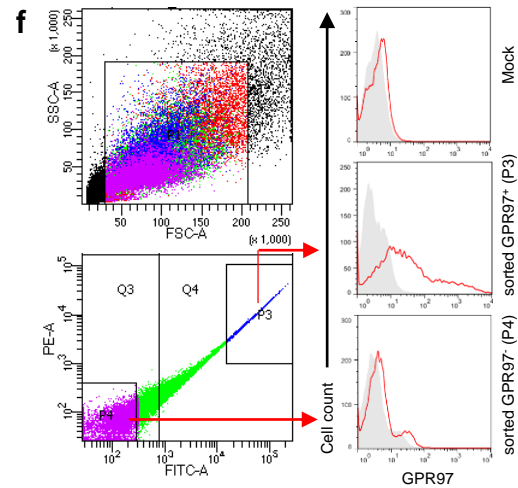

**Supplementary Fig. 2** Identification of mPR3 as the GPR97-specific binding partner on human neutrophils. **a.** Flow cytometry analyses of specific surface markers in neutrophils treated without or with phosphoinositide phospholipase C (PI-PLC). Markers included CD11b, CD55, and CD177. Both CD55 and CD177 are glycosylphosphatidylinositol-anchored proteins while CD11b is a transmembrane protein. **b.** Fluorescence staining of mPR3 (green) and CD177 (red) in neutrophils treated with mFc or GPR97<sup>E</sup>-mFc. The mFc-fusion protein probes were detected using anti-mFc mAb (blue). Arrows indicated CD177<sup>-</sup> neutrophils. Scale bar, 20  $\mu$ m. Experiments were repeated 3 times with similar results. **c.** Dot-plots of flow cytometry analyses of neutrophils double-stained with GPR97<sup>E</sup>-mFc and anti-CD55 or anti-OLFM4. neutrophils were fixed without or with membrane permeabilization to stain for membrane or intracellular proteins, respectively. **d.** Flow cytometry analyses of CD177 expression of neutrophils that were subjected to MACS sorting for the enrichment of CD177<sup>+</sup> and CD177<sup>-</sup> sub-populations. **e.** Ligand-binding assays showing no homotypic and heterotypic protein-protein interactions between GPR97 and CD177. HEK-293T transfectants expressing CD177 or GPR97 were incubated with GPR97<sup>E</sup>-mFc or CD177-mFc proteins, washed, and stained with anti-mFc mAb followed by detection with the fluorescence-labeled 2<sup>nd</sup> Ab. GPR97 and CD177 expression in transfected cells were confirmed using anti-GPR97 (G97-A) and anti-CD177 (MEM166) mAbs, respectively. **f.** Flow cytometry plots showing the FACS-sorted GPR97<sup>high</sup> and GPR97<sup>low</sup> populations of HEK-293T transfectants. Source data are provided in the Source Data file.

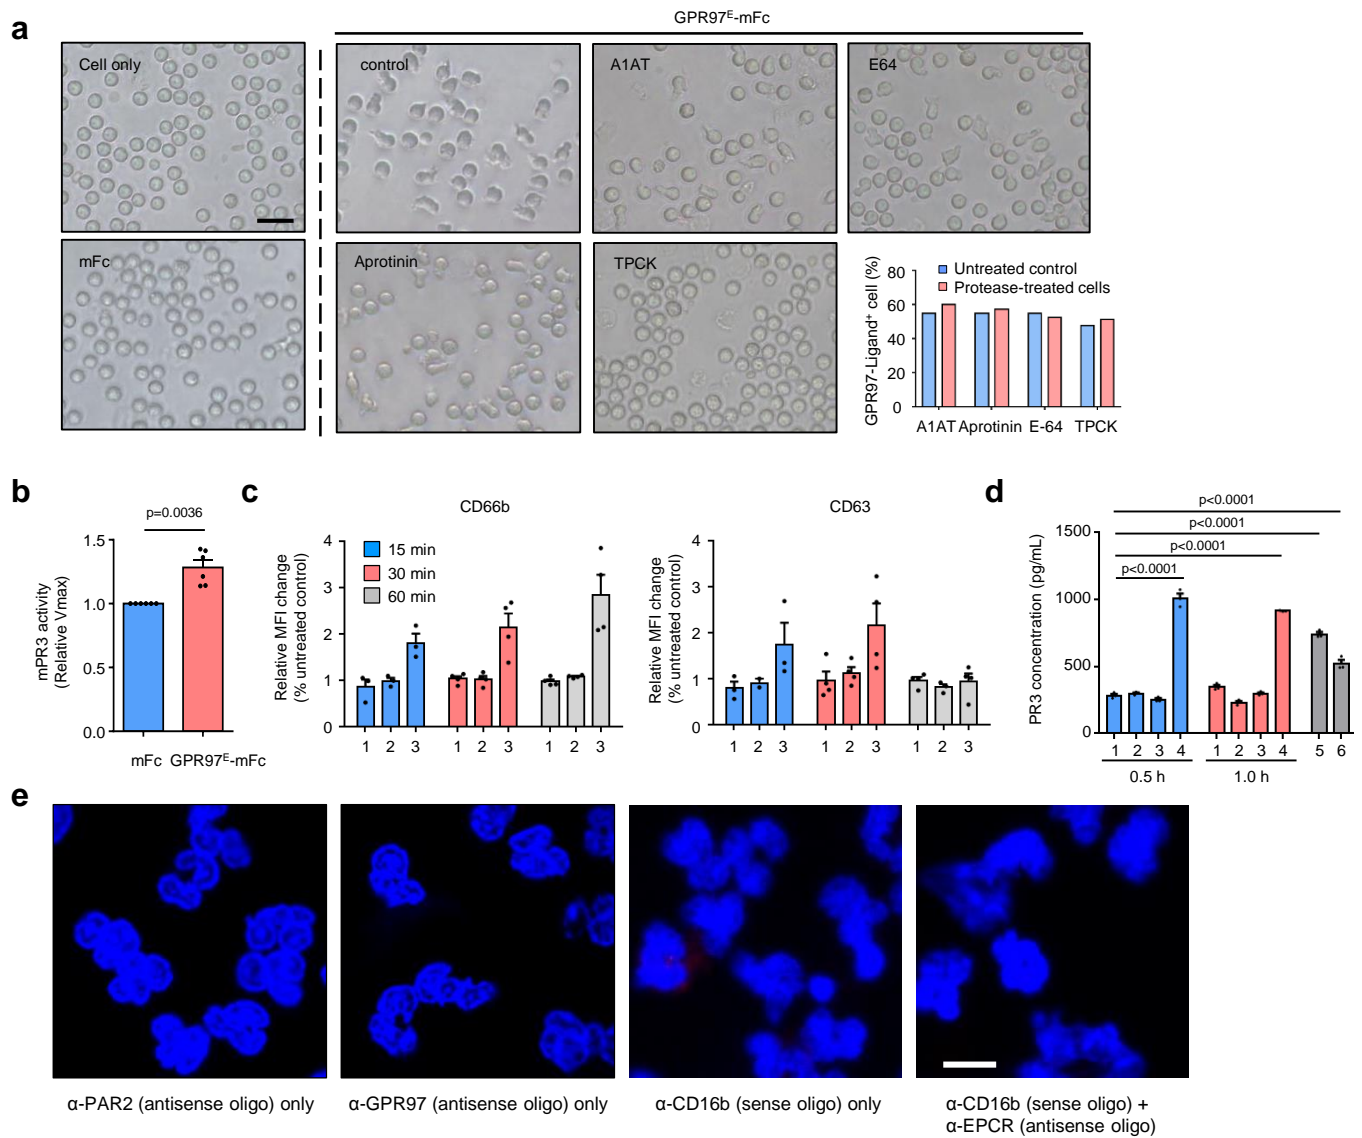

**Supplementary Fig. 3** GPR97 is a positive allosteric effector of neutrophil mPR3. **a.** Morphological changes of neutrophils treated with GPR97<sup>E</sup>-mFc in the absence or presence of protease inhibitors as indicated. Cells only and mFc-treated cells were negative controls. Scale bar, 50  $\mu$ m. The lower panel at right indicated similar percentages of GPR97-ligand<sup>+</sup> neutrophils in the absence or presence of protease inhibitors as indicated. Data shown are the results of one representative of 3 independent experiments with similar results. **b.** The relative V<sub>max</sub> of mPR3 enzymatic activity of neutrophils incubated with mFc and GPR97<sup>E</sup>-mFc (n = 3). Data are presented as means  $\pm$  SEM. P value was determined by two-sided unpaired student's t-test. **c, d.** Flow cytometry (**c**) and ELISA (**d**) analyses showing that GPR97<sup>E</sup>-mFc treatment did not induce significant neutrophil degranulation. **c.** Relative cell surface CD66b and CD63 expression levels of neutrophils treated with mFc (# 1), GPR97<sup>E</sup>-mFc (# 2), or fMLF (#3) for different time periods were compared with those of untreated cells (n = 3). CD66b and CD63 were used as degranulation markers of specific and azurophilic granules, respectively. **d.** Relative PR3 concentration changes detected by ELISA analysis of supernatants of neutrophils treated without (# 1) or with mFc (# 2), GPR97<sup>E</sup>-mFc (# 3), or cytochalasin B + fMLF (# 4) for different time periods as indicated (n = 3). Cells treated with A23187 (1  $\mu$ M) for 10 min (# 5) and 15 min (# 6) were included as positive controls. Data are presented as means  $\pm$  SEM. P value was determined by one-way ANOVA. **e.** Results of the PLA analyses showing the minimal background signals when using mAb probes for single receptors and non-associated receptor pairs as indicated. Scale bar, 10  $\mu$ m. Experiments were repeated 3 times with similar results. Source data are provided in the Source Data file.

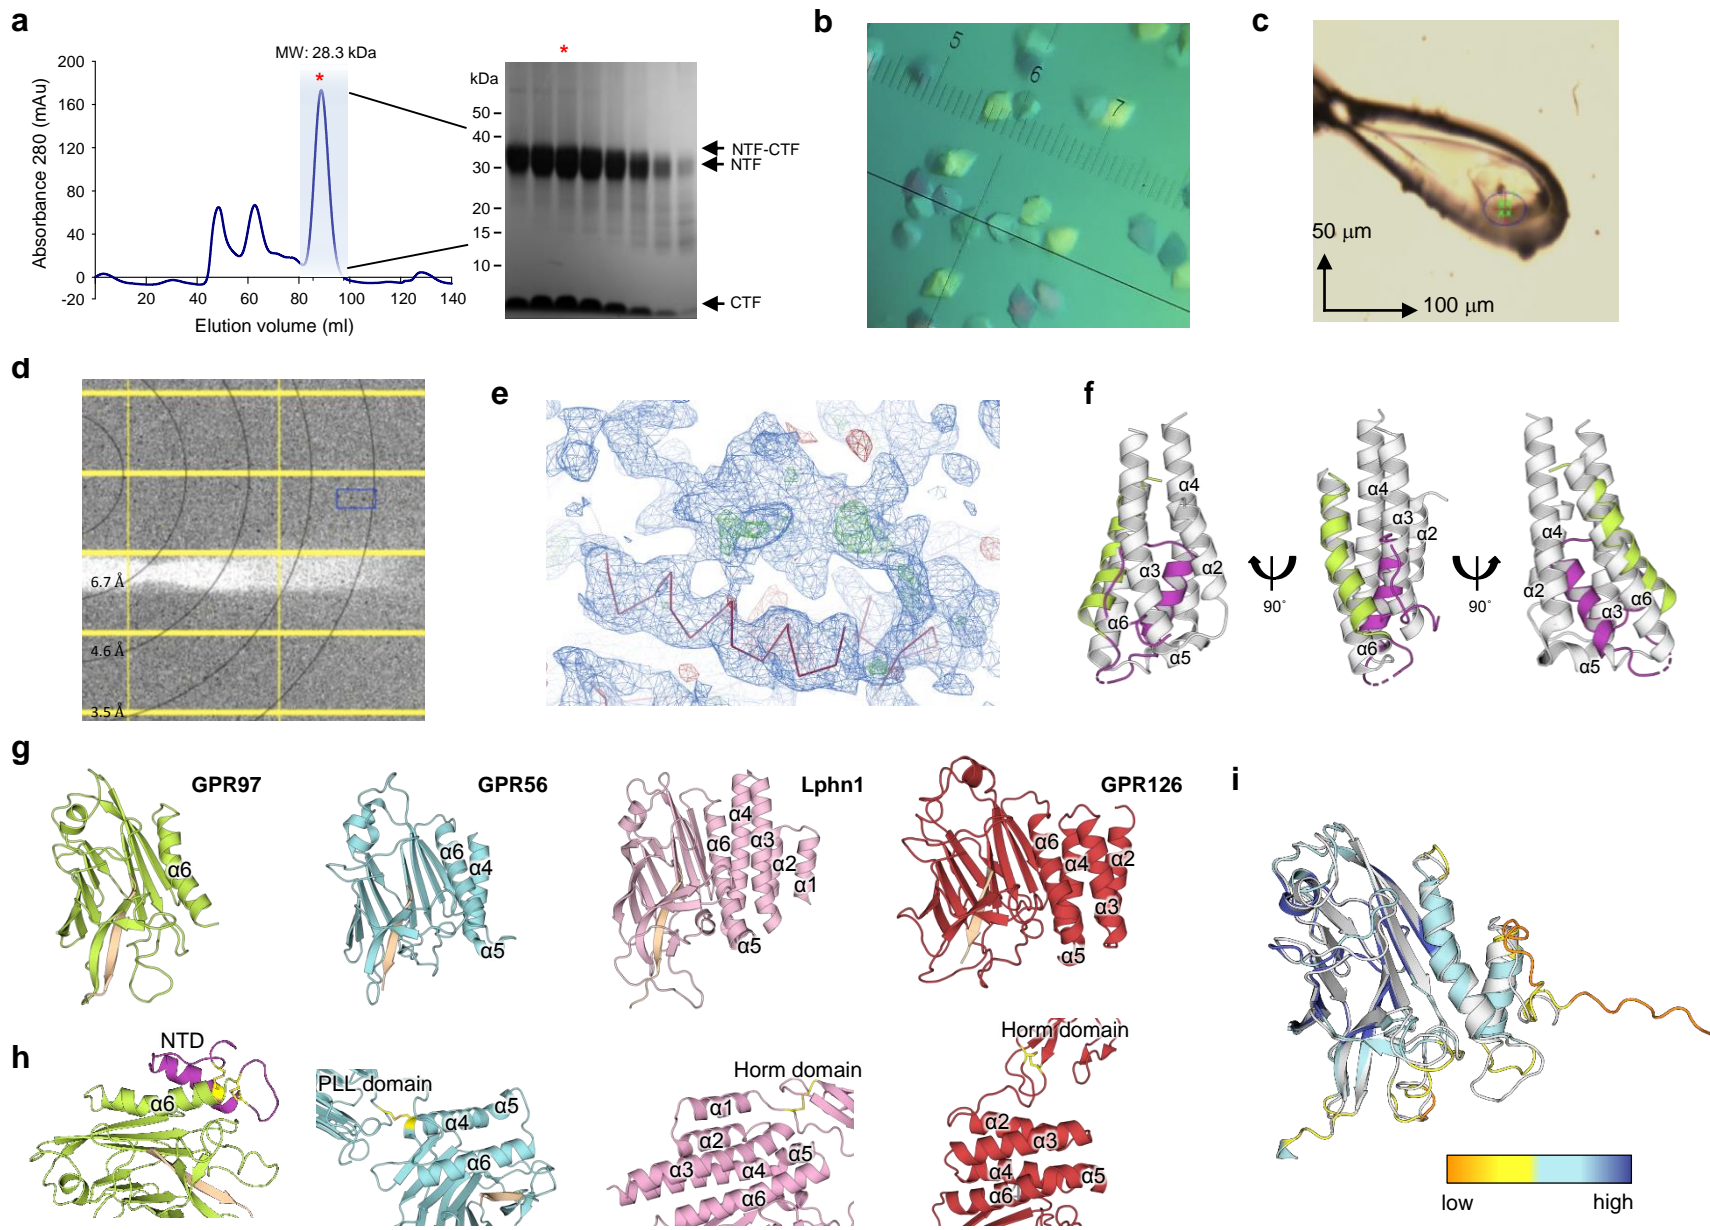



**Supplementary Fig. 4** Crystallographic studies of GPR97-ECR. **a.** Representative SEC elution profile and SDS-PAGE analysis of purified GPR97-ECR purification. The red asterisk indicated the GPR97-ECR-containing SEC peak and protein purity was assessed by coomassie blue staining in SDS-PAGE gels. GPR97-ECR run as two bands (NTF and CTF) on the SDS-PAGE gel due to partial autoproteolysis of its GAIN domain. **b.** GPR97-ECR crystals were grown in 1.8 M tri-ammonium citrate pH 7. **c.** Crystals were cryo-protected and individually assessed for diffraction quality. Experiments of **a-c** were repeated 3 times with similar results. **d.** A representative image from the native X-ray diffraction dataset collected at the ESRF beamline ID30B. Resolution rings are indicated. **e.** The  $\alpha$  helix of GPR97 GAIN subdomain A is depicted in a red trace in a 2Fo-Fc electron density map shown at the 1 sigma level in blue. Clear additional density is seen on top of the GPR97 GAIN domain, accounting for the small NTD. The Fo-Fc electron density map is shown at +/- 3 sigma level in green and red, respectively. **f.** Structural alignment of the  $\alpha$  helix from the GPR97 GAIN domain (green) with the  $\alpha$ 2- $\alpha$ 6 helices from LPHN1 GAIN domain (white, PDB ID: 4DLQ) showing that the NTD (purple) is not part of the GAIN domain. **g.** Structural comparison of GPR97 GAIN domain with those crystallised and available in the PDB database (PDB IDs: 5KVM (GPR56), 4DLQ (Lphn1), 6V55 (GPR126)). **h.** Close-up of the interdomain disulphide bridges linking the GAIN domain of GPR97, GPR56, Lphn1 and GPR126 to the NTD, PLL domain, Horm domain and Horm domain, respectively. **i.** Structural comparison of the model predicted by alpha-fold with our experimental model (white). The alpha-fold model is coloured from very low model confidence (orange) to very high model confidence (blue). Source data are provided in the Source Data file.

**a**

○○○○○○○○○○

|            |    |                                                                                        |
|------------|----|----------------------------------------------------------------------------------------|
| Human      | 21 | QEK-----PTEGPRNTCLG-----SNNMYDIFNLDKALCF <sup>1</sup> TKCRQSGSDSC                      |
| Chimpanzee | 21 | QEK-----PTEGPRNTCLG-----SNNMYDIFNLDKALCF <sup>1</sup> TKCRQSGSNSC                      |
| Mouse      | 19 | EET-----TEEPRNVCRR-----LQEGHEYDTFDLNDTAQCF <sup>1</sup> TKCGQSEHSPC                    |
| Rabbit     | 68 | EK-----PTEGPRNVCCLG-----LLGADQYDPFFLSDTAKCF <sup>1</sup> QRCRRRQSESC                   |
| Bovine     | 19 | EED-----STPKYEEPRNVCQG-----FTNMNSYEDFDLNRTAGCF <sup>1</sup> SKCTRSQEKLC                |
| Dog        | 22 | MEN---SKKELRKEPEQPRNVCCLG-----LINKGRYSEFHLGNTAKCF <sup>1</sup> SKCTQSNTEDC             |
| Bat        | 72 | EK-DFTNKSEQTQIEEPRNVCCLG-----LINKDHYEPFELMSTAE <sup>1</sup> CFNNCAQSGSSSC              |
| Whale      | 67 | QKN-----SATMPEESRQPC <sup>1</sup> CKG-----LINAIRFDNFGLKDTAKCF <sup>1</sup> KACAPSGNEPC |
| Alligator  | 28 | GD-----NSES <sup>1</sup> CLETLPLTDNPQNLKTDKKIIRLS--ATCDDLWQ <sup>1</sup> TNSDP-C       |
| Chicken    | 53 | QDSCDALSRGD----ETKQCCNMAVE----PEERAEGRLALELPHOC <sup>1</sup> TELRRSGQ-PAC              |

α6                      β1                      β2

○○○○○○○○○○                      →                      →

|            |                                                                                                                  |
|------------|------------------------------------------------------------------------------------------------------------------|
| Human      | NVENLQ--RYWLN <sup>1</sup> YEAHLMKE-GLTQKVNT <sup>1</sup> PFLKALVQNLS                                            |
| Chimpanzee | NVENLQ--RYWLN <sup>1</sup> YEAHLMKE-GLTQKVNT <sup>1</sup> PFLKALVQNLS                                            |
| Mouse      | DVGNLQ--RYWLN <sup>1</sup> YESYLL-E-NSMETVDMPE <sup>1</sup> FKALIQNIS                                            |
| Rabbit     | NVEKLE--RYWLN <sup>1</sup> YEKHLV-E-NLKGEVDLGE <sup>1</sup> FKAVVQNLS                                            |
| Bovine     | H LGNLQ--RYWLN <sup>1</sup> FE <sup>1</sup> TYLV-ERNQMD <sup>1</sup> TLN <sup>1</sup> TSFL <sup>1</sup> TAFVKSIN |
| Dog        | DLENLQ--RYW <sup>1</sup> LKFEDHLV-E-SQSGIVNMS <sup>1</sup> FLKAAVQNVN                                            |
| Bat        | HLENLQ--RYW <sup>1</sup> LDYET <sup>1</sup> YLV-ERRLSG <sup>1</sup> TVDL <sup>1</sup> PFLKAFVKNVS                |
| Whale      | NLRNLQ--RYW <sup>1</sup> LN <sup>1</sup> YE <sup>1</sup> IHLV-EKSLTET <sup>1</sup> VNMDFL <sup>1</sup> KALVKNIN  |
| Alligator  | ISLRKQILRYW <sup>1</sup> LHFEDHLITTWYTQD <sup>1</sup> SLDLN <sup>1</sup> WAKTRSQNIS                              |
| Chicken    | R--CLA--R-WLRM <sup>1</sup> VQFA--E-----QSSTAGLRALHLNVS                                                          |

**b**

α6                      β1                      β2

○○○○○○○○○○                      →                      →

|                 |      |                                                                                                        |
|-----------------|------|--------------------------------------------------------------------------------------------------------|
| ADGRG3 (GPR97)  | 63   | -NVENLQRYWLN <sup>1</sup> YEAHLMKE-----GLTQKVNT--PFLKALVQNLS                                           |
| ADGRL1 (LPHN1)  | 648  | HTATMLLDVLEEGAFLLADNVRE-----PARFLAAK--ENVVLEVTVLN                                                      |
| ADGRL2 (LPHN2)  | 635  | HTATMLLD <sup>1</sup> TLEEGAFV <sup>1</sup> LADN <sup>1</sup> LLE-----PTRVSMPT--ENIVLEVAVLS            |
| ADGRL3 (LPHN3)  | 651  | RAATMLLHTVEESAFLVADNLLK-----TDIVRENT--DNIKLEVARLS                                                      |
| ADGRL4 (ELTD1)  | 220  | THLTKLMHTVEQATLRI <sup>1</sup> SQSFQK-----TTEFD <sup>1</sup> TNS--TDIALK <sup>1</sup> VFFFD            |
| ADGRE1 (EMR1)   | 400  | SLATV <sup>1</sup> LESVESMTLAS <sup>1</sup> FWKPSA-----NITPAVRT--EYLDIESKVIN                           |
| ADGRE2 (EMR2)   | 328  | CVASHLLDGL <sup>1</sup> EDVLRGLSKNLSN-----GLLNFSY <sup>1</sup> P--AGTELSLEVQK                          |
| ADGRE3 (EMR3)   | 159  | STATTLIRLDV <sup>1</sup> ESKVL <sup>1</sup> TALKDPE-----QKVLKI <sup>1</sup> QN--DSVAIETQAIT            |
| ADGRE5 (CD97)   | 325  | LIATQLLSNLE <sup>1</sup> DIRILAKSLPK-----GPFTYISP--SNT <sup>1</sup> ELTMIQE                            |
| ADGRA2 (GPR124) | 510  | KACSRIVGALERIGGAALSPH-----AQHISVNA--RNVALEYLIK                                                         |
| ADGRA3 (GPR125) | 509  | KACSRIVQCLQRIATYRLAGG-----AHVYSTYS--PNIALEYVIK                                                         |
| ADGRC1 (CELSR1) | 2211 | GGTAQLRRLEGYFSN <sup>1</sup> VARNVRR <sup>1</sup> T---YLRPFVIVT--ANMILAVDIFD                           |
| ADGRC2 (CELSR2) | 2132 | GGTAWLLQHYEAYASALAQNMRHT---YLSPT <sup>1</sup> I <sup>1</sup> VT--PNIVISVVR <sup>1</sup> LD             |
| ADGRC3 (CELSR3) | 2289 | PGSAGLVRHLEEYAA <sup>1</sup> TLAR <sup>1</sup> NMELT---YLNPMGLVT--PNIMLSIDRME                          |
| ADGRD1 (GPR133) | 344  | AVVLSLIDTID <sup>1</sup> VMGHVSSNLHG-----STPQVTVEGSSAMAEFSVAKIL                                        |
| ADGRD2 (GPR144) | 486  | GGPMALVASVQRLAPLLSTSM <sup>1</sup> TS---ERPRMRIQH--RHAGLSGVTVI                                         |
| ADGRF1 (GPR110) | 399  | YASSRLELTLENISTLV <sup>1</sup> PP <sup>1</sup> TAL-----PLNFSR--KFIDWKGIPVN                             |
| ADGRF2 (GPR111) | 260  | NSSYL <sup>1</sup> LH <sup>1</sup> SVNSFAR <sup>1</sup> RL <sup>1</sup> FD-----KHPVDISD--VFIHTMGTTIS   |
| ADGRF3 (GPR113) | 578  | WAGSTLL <sup>1</sup> LAVETL <sup>1</sup> ACSLC <sup>1</sup> PQD-----HPFAFSL--PNVLLQSQ <sup>1</sup> LFG |
| ADGRF4 (GPR115) | 209  | NASSDLLQSVNLFARQLHIHN-----NSENIVNE--LFIQTKGFHIN                                                        |
| ADGRF5 (GPR116) | 820  | NQSSQLLH <sup>1</sup> SVERFSQALQSGD-----SPPLSFSQ--TNVQMSM <sup>1</sup> VIK                             |
| ADGRB1 (BAI1)   | 736  | PNAKELFRLVEDFVDVIGFRMKD-----LRDAYQVT--DNLVLSIHKLP                                                      |
| ADGRB2 (BAI2)   | 689  | PGSVHLRRVVE <sup>1</sup> DFIHLVGDALKA-----FQSSLIVT--DNLVISIQREP                                        |
| ADGRB3 (BAI3)   | 669  | PGSIELMQVIEDFIHIVGMGMMD-----FQNSYLMT--GNVVASIQKLP                                                      |
| ADGRG1 (GPR56)  | 203  | APASQQLQSLESKLT <sup>1</sup> SVRFMG-----DMVSFEE--DRINATVWKLQ                                           |
| ADGRG2 (GPR64)  | 419  | -LAQRLLKVVDDIGLQLNFS-----NTTISLTS--PSLALAVIRVN                                                         |
| ADGRG4 (GPR112) | 2535 | -ISNELLR <sup>1</sup> RIERTGHKMEFS-----GQIANLTV--AGLALAVLRGD                                           |
| ADGRG5 (GPR114) | 44   | -FSSRQLH <sup>1</sup> QLEQLLN-----TSFPGYNLTQPTTIQSLAFKLS                                               |
| ADGRG6 (GPR126) | 649  | -SSSEALKTIDELAFKIDLNS-----TSHVNIIT--RNLALS <sup>1</sup> VSSLL                                          |
| ADGRG7 (GPR128) | 229  | DALTTLIEQMETYSLSLG-----NQSVVE--PNIAIQSANFS                                                             |
| ADGRV1 (VLGR1)  | 5708 | -GFSHFAEVTENAFSLLTNVTCGSPGEKSKTILDSC--PYLSILALHWY                                                      |

**Supplementary Fig. 5** The NTD is stabilised by hydrophobic interactions conserved in all GPR97 orthologs, but not found in other GAIN domains. **a.** Sequence alignment with secondary structure of the NTD,  $\alpha 6$  helix and  $\beta 1$ - $\beta 2$  strands of the GAIN domain of GPR97 orthologs. The conserved cysteines involved in known disulphides bridges are shown in bold and highlighted in yellow. The conserved residues involved in the hydrophobic interactions stabilising the NTD to the GAIN domain are shown in bold and highlighted in grey. **b.** Sequence alignment with secondary structure of the  $\alpha 6$  helix and  $\beta 1$ - $\beta 2$  strands of the GAIN domain of all aGPCRs. The residues involved in stabilising GPR97 NTD to its GAIN domain are shown in bold and highlighted in grey. Source data are provided in the Source Data file.

**a**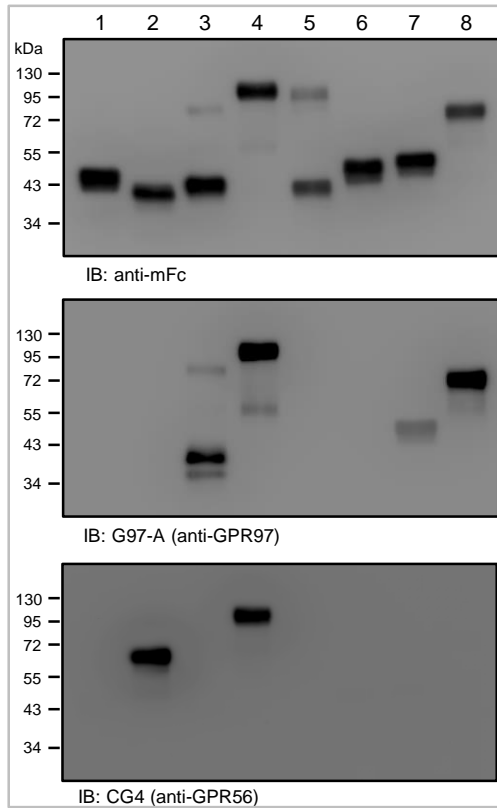**b**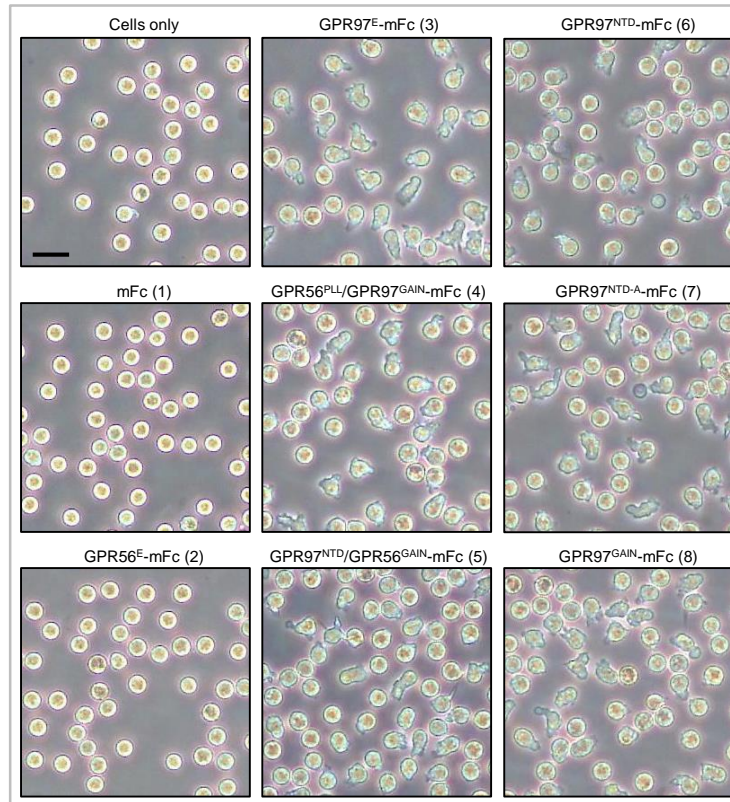

**Supplementary Fig. 6** Mapping of the mPR3-binding regions in GPR97-ECR. **a.** Western blot analyses of the domain-swapped and domain-truncated GPR97<sup>E</sup>-mFc probes. Lane 1, mFc only; 2, GPR56<sup>E</sup>-mFc; 3, GPR97<sup>E</sup>-mFc; 4, GPR56<sup>PLL</sup>/GPR97<sup>GAIN</sup>-mFc; 5, GPR97<sup>NTD</sup>/GPR56<sup>GAIN</sup>-mFc; 6, GPR97<sup>NTD</sup>-mFc; 7, GPR97<sup>NTD-A</sup>-mFc; 8, GPR97<sup>GAIN</sup>-mFc. Blots were probed with anti-mFc (top panel), G97-A (anti-GPR97 mAb)(middle panel), and CG4 (anti-GPR56 mAb)(lower panel), respectively. **b.** Morphological changes of neutrophils induced by various GPR97<sup>E</sup>-mFc probes as indicated. Cells only and those treated with mFc and GPR56<sup>E</sup>-mFc were included as negative controls. Scale bar, 50  $\mu$ m. Experiments were repeated 3 times with similar results. Source data are provided in the Source Data file.

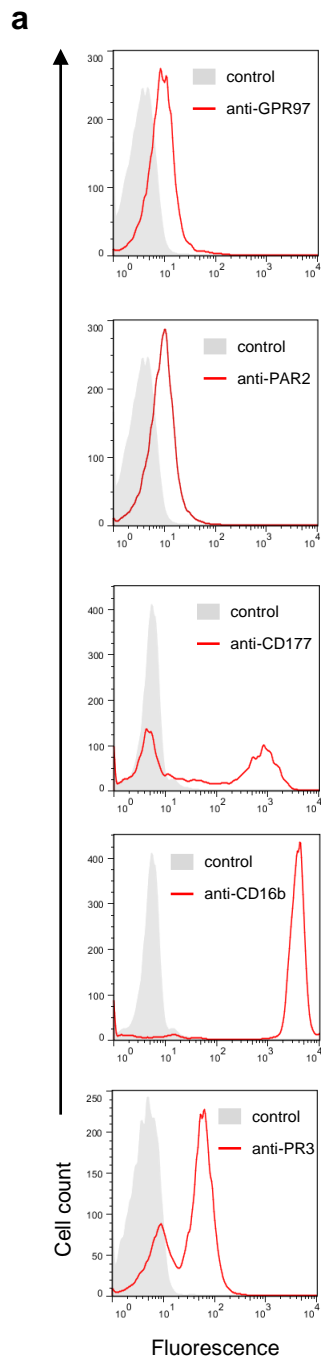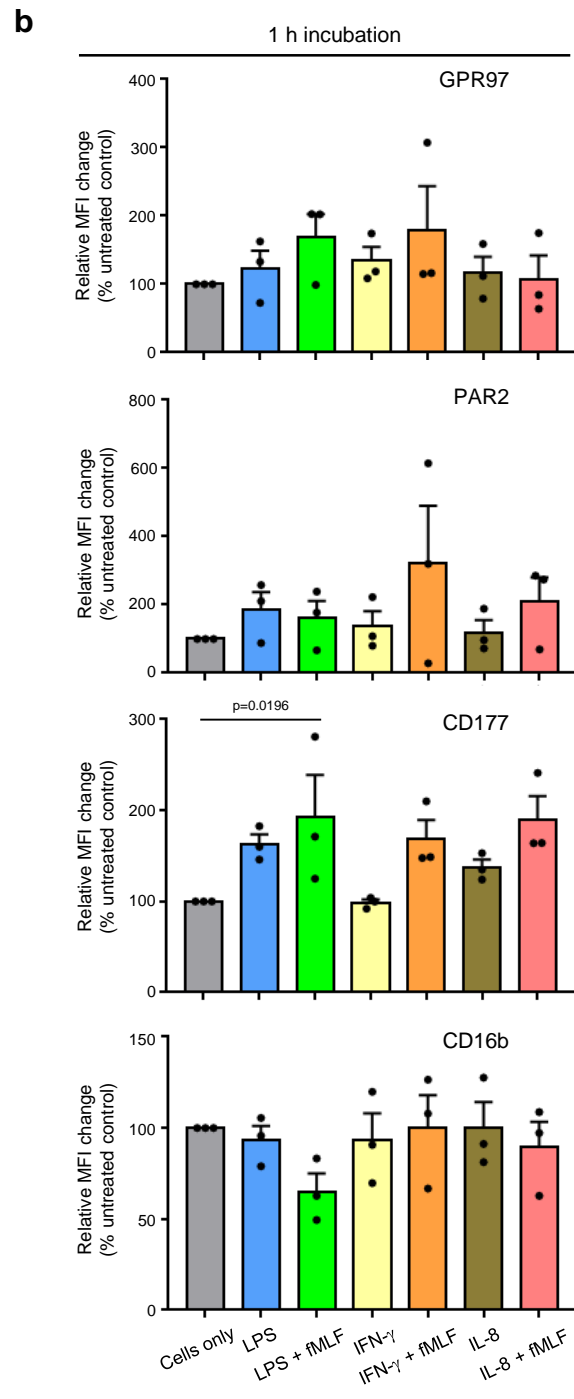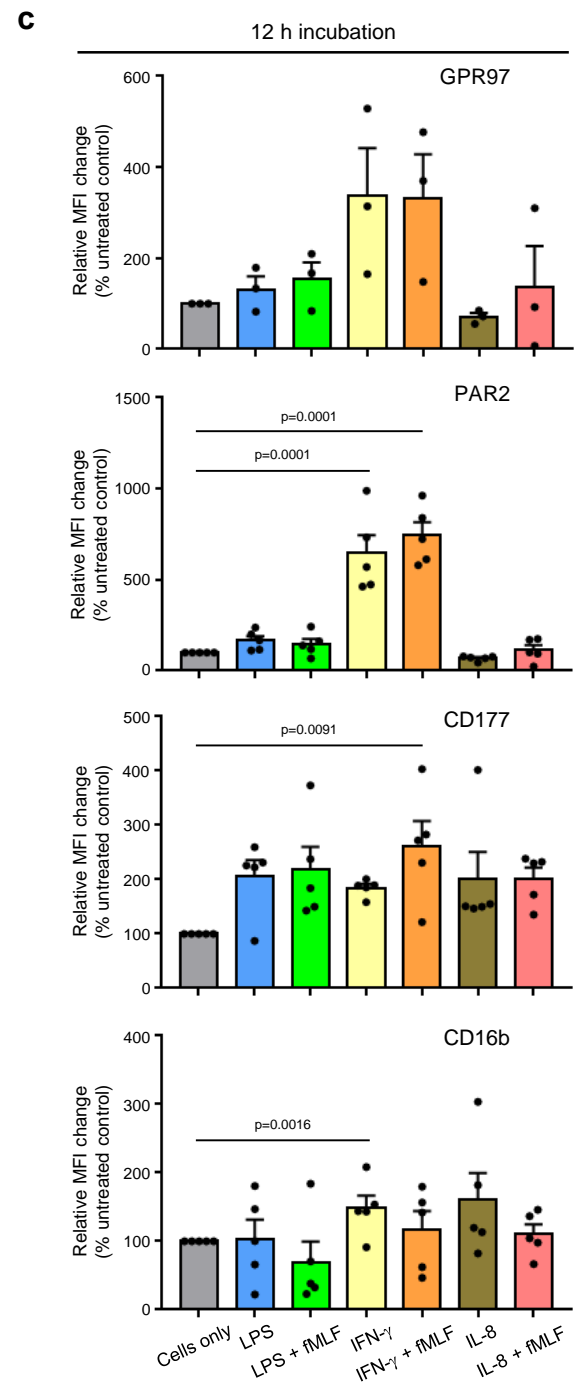

**Supplementary Fig. 7** Expressional regulation of GPR97 and PAR2 in neutrophils. **a.** Representative expression profiles of indicated receptors in resting human neutrophils detected by flow cytometry. **b, c.** Flow cytometry analyses of GPR97, PAR2, CD177, and CD16b expression in resting neutrophils treated without or with various inflammatory stimuli (LPS, 200 ng/mL; IFN- $\gamma$ , 200 U/mL; IL-8, 400 ng/mL; fMLF, 1  $\mu$ M) for 1 h (n = 3) (**b**) or 12 h (n = 5, except GPR97 n = 3) (**c**). Data are presented as means  $\pm$  SEM. P value was determined by one-way ANOVA. Source data are provided in the Source Data file.

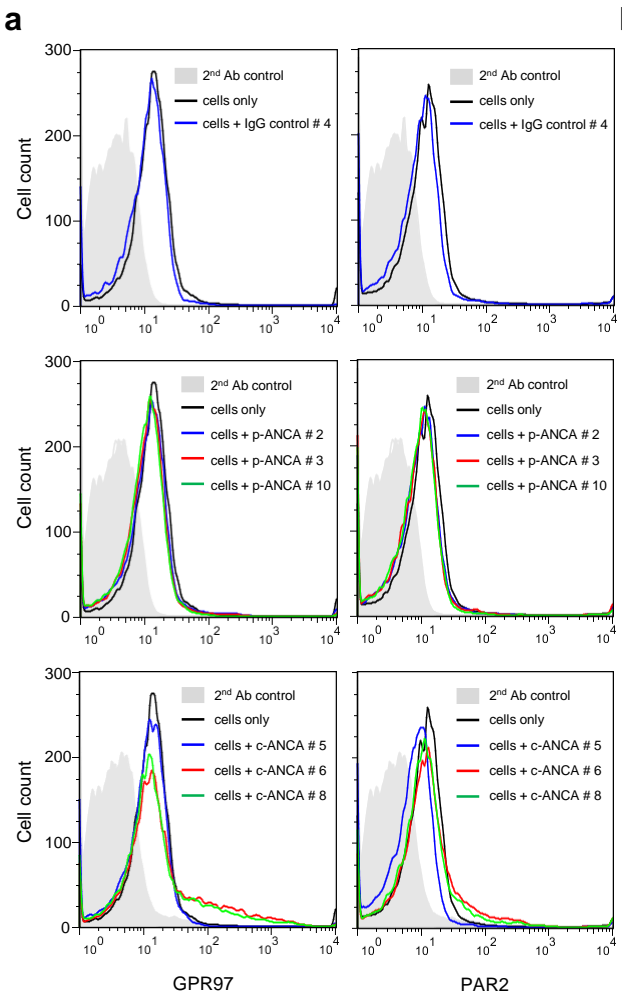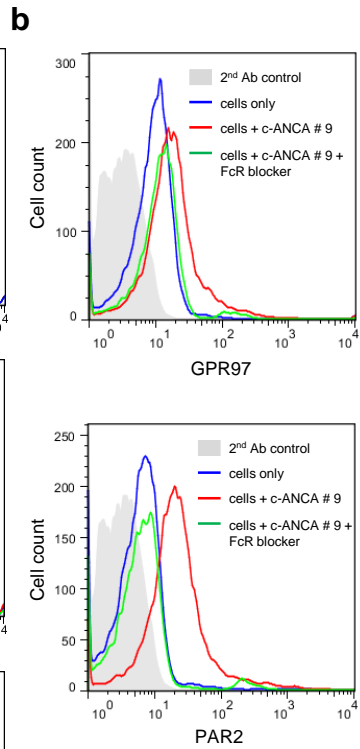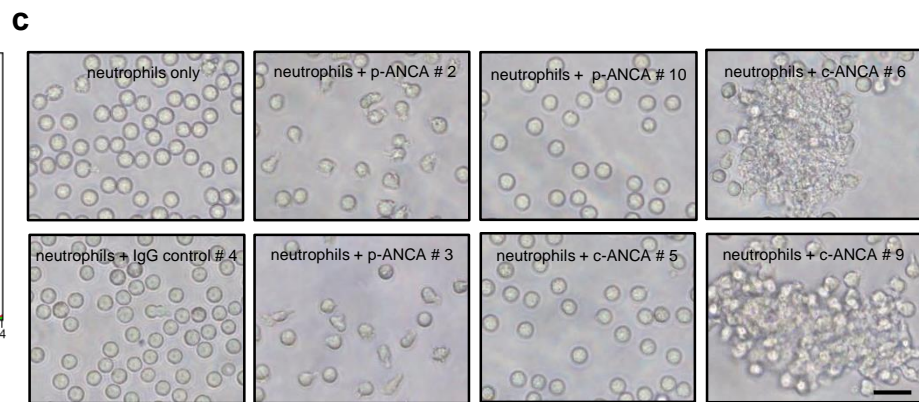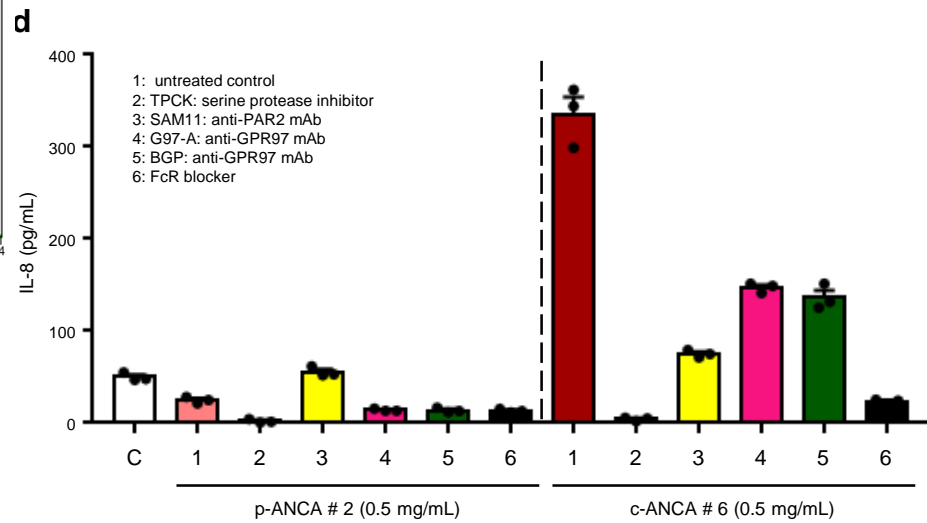



**Supplementary Fig. 8** FcR-dependent up-regulated expression of GPR97 and PAR2 in neutrophils. **a.** Flow cytometry analysis of up-regulated GPR97 and PAR2 expression in neutrophils incubated with purified PR3-ANCA IgGs but not purified MPO-ANCA IgGs as indicated. **b.** Representative flow cytometry analyses of FcR-dependent GPR97 and PAR2 up-regulated expression in neutrophils incubated with purified PR3-ANCA IgGs. **c.** Representative light microscope images showing aggregates of neutrophils incubated with purified PR3-ANCA IgGs but not purified MPO-ANCA IgGs as indicated. Neutrophils only and those treated with control IgGs from a normal subject were included as negative control. Scale bar, 50  $\mu$ m. **d.** ELISA analyses of IL-8 secreted by neutrophils incubated with purified PR3-ANCA or MPO-ANCA IgGs in the absence or presence of protease inhibitors or blocking reagents as indicated. Data are presented as means  $\pm$  SEM of one representative experiment done in triplicate. Source data are provided in the Source Data file.

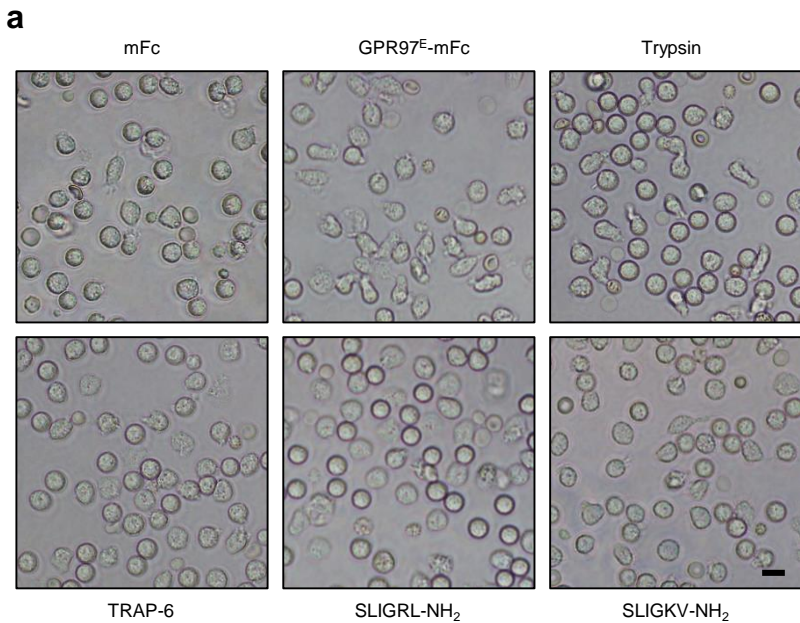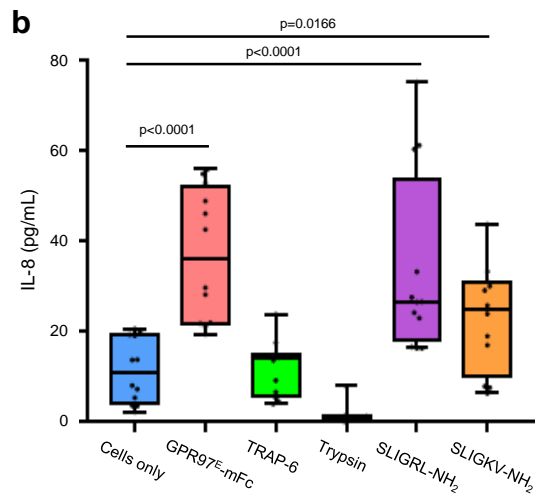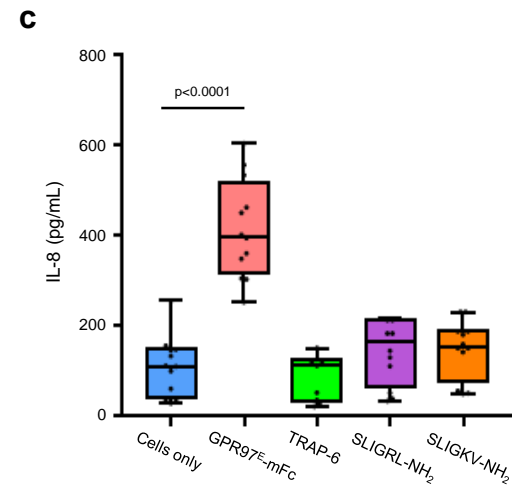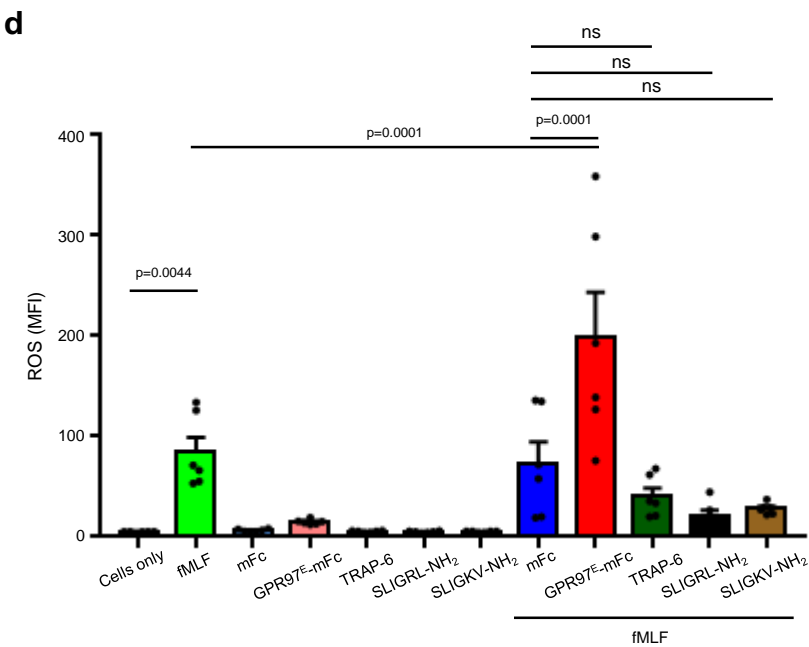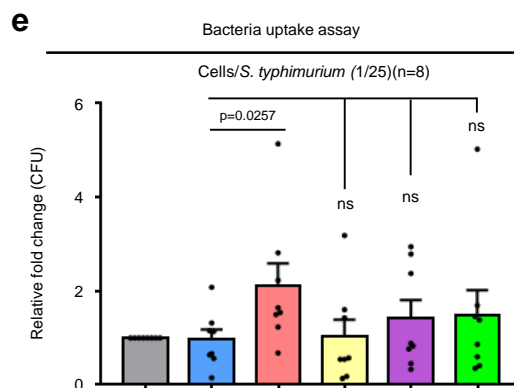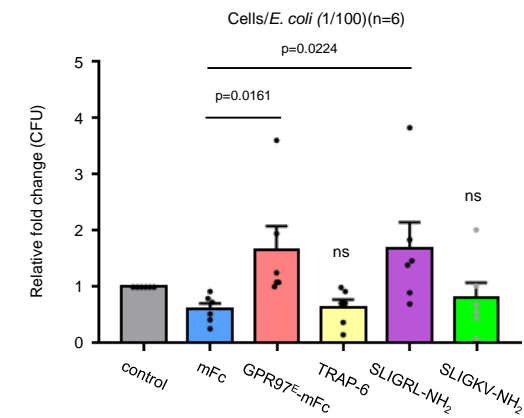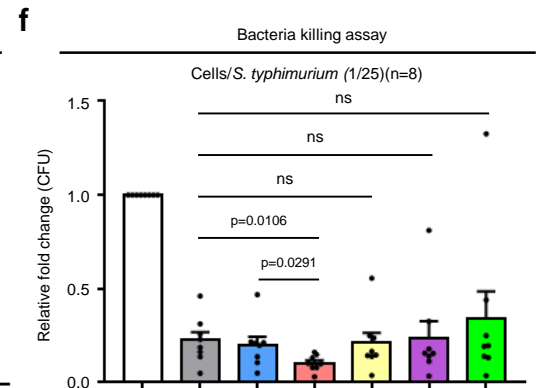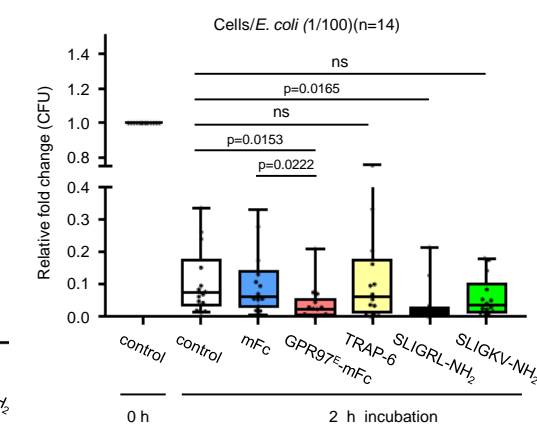

**Supplementary Figure 9:** Comparison of neutrophil activation phenotypes triggered by PAR2-specific agonists and GPR97<sup>E</sup>-mFc. **a.** Morphologies of neutrophils treated without or with GPR97<sup>E</sup>-mFc (10 µg/mL) or various PAR2 activation triggers as indicated (trypsin, 1 µg/mL; SLIGRL-NH<sub>2</sub> agonistic peptide, 100 µM; SLIGKV-NH<sub>2</sub> agonistic peptide, 100 µM) for 1 h. The PAR1-specific TRAP-6 agonistic peptide (30 µM) was included as a negative control. Scale bar, 20 µm. Experiments were repeated 3 times with similar results. **b, c.** ELISA analysis of IL-8 secreted by neutrophils treated as indicated in serum-free medium (**b**) or RPMI complete medium (**c**) for 3 h. n = 4 independent experiments. Data are presented as means ± SEM. P value was determined by one-way ANOVA. Note that while comparable IL-8 levels were up-regulated in neutrophils incubated with GPR97<sup>E</sup>-mFc and PAR2-agonistic peptides in serum-free medium (**b**), its concentrations were of very low levels compared to those secreted from cells cultured in RPMI complete medium in which only GPR97<sup>E</sup>-mFc, but not PAR2-agonistic peptides, induced significantly increased IL-8 (**c**). **d.** Analysis of ROS production by neutrophils treated without or with various triggers in the absence or presence of fMLF (1 µM) as indicated. mFc was included as a negative control. n = 3 independent experiments. Data are presented as means ± SEM. P value was determined by one-way ANOVA. **e, f.** Phagocytosis (**e**) and killing (**f**) of live bacteria (*E. coli*, n = 6 for phagocytosis assay n = 14 for killing assay, and *S. typhimurium* n = 8 for both assays) by neutrophils incubated without or with GPR97<sup>E</sup>-mFc and PAR2-agonistic peptides as indicated. mFc and TRAP-6 were included as negative controls. Data are presented as means ± SEM. P value was determined by one-way ANOVA. ns, non-significant. Source data are provided in the Source Data file.

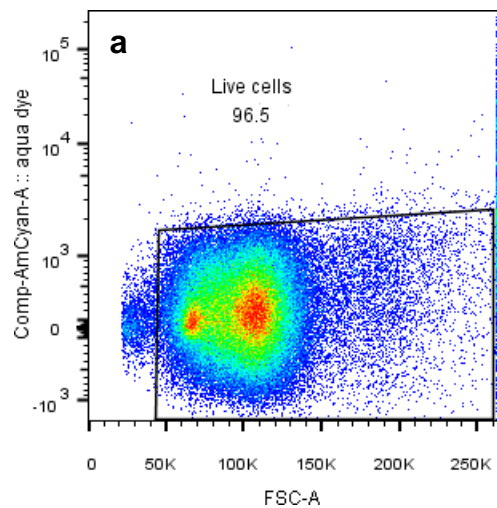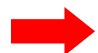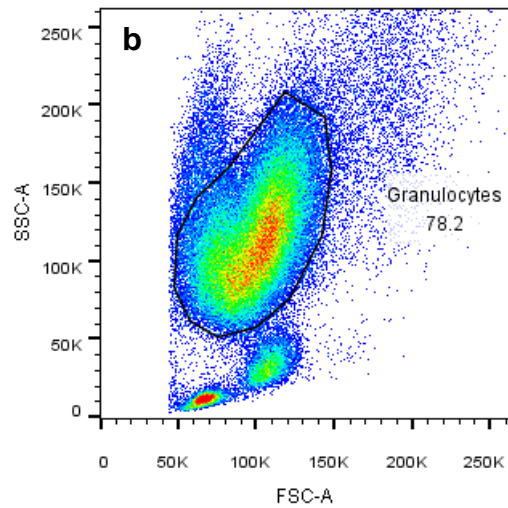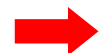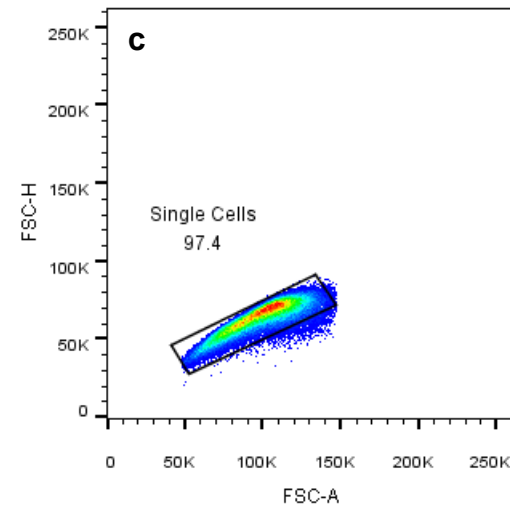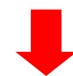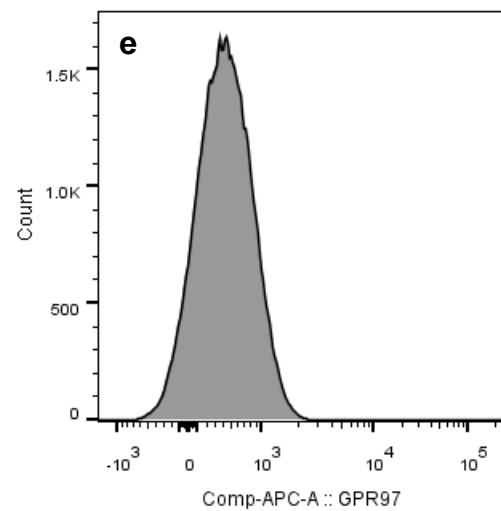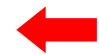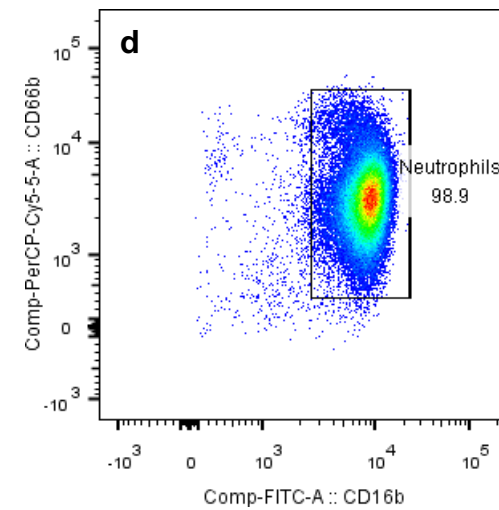

**Supplementary Figure 10:** FACS strategy of gating human neutrophil leukocytes from blood samples for FACS data in the Figure 1d. Viable blood cells were gated negatively on aqua fluorescent dye (a) and then granulocytes were gated by FSC versus SSC graph (b). Subsequently, single cells (c) from total granulocytes were gated for CD16b<sup>+</sup> neutrophils (d) and the mean fluorescent intensity of GPR97 on this CD16b<sup>+</sup> population was determined (e).

**Supplementary Table 1 Antibody list**

| <b>Antibody</b>                                      | <b>Antibody #Catalog</b>              | <b>Clone</b> | <b>Assay</b>                                                    |
|------------------------------------------------------|---------------------------------------|--------------|-----------------------------------------------------------------|
| anti-CD11b                                           | BD Biosciences #555388                | ICRF44       | FACS (5 µg/mL)                                                  |
| anti-CD62L                                           | BD Biosciences #555544                | DREG-56      | FACS (5 µg/mL)                                                  |
| anti-CD11a                                           | BD Biosciences #555379                | G43-25B      | FACS (5 µg/mL)                                                  |
| anti-CD16                                            | BD Biosciences #555407                | 3G8          | FACS (5 µg/mL)                                                  |
| anti-CD44                                            | BD Biosciences #555478                | G44-26       | FACS (5 µg/mL)                                                  |
| anti-CD54                                            | BD Biosciences #559771                | HA58         | FACS (5 µg/mL)                                                  |
| anti-CXCR1                                           | BD Biosciences #555939                | 5A12         | FACS (5 µg/mL)                                                  |
| anti-CXCR4                                           | BD Biosciences # 555974               | 12G5         | FACS (5 µg/mL)                                                  |
| anti-CD51                                            | BD Biosciences #565835                | NKI-M9       | FACS (5 µg/mL)                                                  |
| anti-CD18                                            | BD Biosciences #555924                | 6.7          | FACS (5µg/ml)                                                   |
| anti-CD18                                            | BioLegend #302108                     | TS1/18       | FACS (5 µg/mL)                                                  |
| anti-CD41/CD61                                       | BioLegend #359810                     | A2A9/6       | FACS (5 µg/mL)                                                  |
| anti-CD62P                                           | BioLegend #304906                     | AK4          | FACS (5 µg/mL)                                                  |
| anti-CD63                                            | BD Biosciences #557288                | H5C6         | FACS (5 µg/mL)                                                  |
| anti-CD66b                                           | BD Biosciences #561645                | G10F5        | FACS (5 µg/mL)                                                  |
| anti-CD177                                           | BioLegend #315802                     | MEM-166      | Functional assay (5 µg/mL)                                      |
| anti-CD177                                           | BioLegend #315806                     | MEM-166      | FACS, Confocol (5 µg/mL)                                        |
| anti-CD177                                           | Santa Cruz sc-376329                  | C5           | Western blot (1:500), PLA, Functional assay (5 µg/mL)           |
| anti-Thrombin R                                      | Santa Cruz sc-13503                   | ATAP2        | FACS (5 µg/mL)                                                  |
| anti-CD32                                            | Gene Tex GTX-14572                    | IV.3         | Functional assay (5 µg/mL)                                      |
| anti-PR3                                             | Thermo Fisher MA-11945                | MCPR3-2      | Western blot, FACS, Confocol, Functional assay, ELISA (5 µg/mL) |
| anti-PR3                                             | Sanquin                               | CLB-12.8     | FACS, Confocol, Functional assay (5 µg/mL)                      |
| anti-PR3                                             | EURO DIAGNOSTICA                      | 4A5          | Functional assay (2 µL/test)                                    |
| anti-OLFM4                                           | abcam ab85046                         | Polyclonal   | FACS (5 µg/mL)                                                  |
| anti-PAR2                                            | Santa Cruz sc-13504                   | SAM11        | Western blot, FACS, PLA, Functional assay (5 µg/mL)             |
| anti-PAR2                                            | R&D MAB3949                           | #344222      | Functional assay (5 µg/mL)                                      |
| anti-PAR2                                            | R&D FAB3949P                          | #344222      | FACS (5 µg/mL)                                                  |
| normal mouse IgG <sub>1</sub> -APC                   | Santa Cruz sc-2888                    |              | FACS (5 µg/mL)                                                  |
| normal mouse IgG <sub>1</sub> -PE                    | Santa Cruz sc-2866                    |              | FACS (5 µg/mL)                                                  |
| FITC-conjugated AffiniPure Goat Anti-Rabbit IgG(H+L) | Jackson ImmnunnoResearch #111-095-144 | Polyclonal   | FACS, Confocol (1:200)                                          |
| Alexa Fluor 647-conjugated goat anti-mouse IgG       | Thermo Fisher A-21235                 | Polyclonal   | FACS, Confocol (1:400)                                          |
| anti-EPCR                                            | Santa Cruz sc-53982                   | RCR-49       | FACS (5 µg/mL)                                                  |
| anti-CD55                                            | Santa Cruz sc-59092                   | BRIC 216     | Western blot, FACS, Functional assay (5 µg/mL)                  |
| anti-CD16                                            | BioLegend #302002                     | 3G8          | Western blot, PLA (5 µg/mL)                                     |
| anti-CD62E                                           | BD Biosciences #551144                | 68-5H11      | FACS (5 µg/mL)                                                  |
| anti-VCAM-1                                          | BD Biosciences #561679                | 51-10C9      | FACS (5 µg/mL)                                                  |
| anti-EMR2                                            | Invitrogen #MA5-16474                 | 2A1          | FACS, Functional assay (5 µg/mL)                                |
| anti-GPR97                                           | in house                              | G97-A        | FACS, Western blot, PLA, Confocol, Functional assay (5 µg/mL)   |
| anti-GPR97                                           | in house                              | BGP          | Functional assay (5 µg/mL)                                      |

**Supplementary Table 2 Cell line list**

| Cell line   | Source | Catalogue no. |
|-------------|--------|---------------|
| HT1080      | ATCC*  | CCL-121™      |
| NIH/3T3     | ATCC   | CRL-1658™     |
| HeLa        | ATCC   | CCL-2™        |
| M059K       | ATCC   | CRL-2365™     |
| U-87 MG     | ATCC   | HTB-14™       |
| C32         | ATCC   | CRL-1585™     |
| COS-7       | ATCC   | CRL-1651™     |
| MCF-7       | ATCC   | CRL-3435™     |
| HEK-293T    | ATCC   | CRL-3216™     |
| K-562       | ATCC   | CCL-243™      |
| G5T/VGH     | BCRC*  | 60194         |
| A2058       | ATCC   | CRL-11147™    |
| A375        | ATCC   | CRL-1619™     |
| Jurkat      | ATCC   | TIB-152™      |
| CHO-K1      | ATCC   | CCL-61™       |
| MeWo        | ATCC   | HTB-65™       |
| MEL-14      | ATCC   | HB-132™       |
| THP-1       | ATCC   | TIB-202™      |
| U-937       | ATCC   | CRL-1593.2™   |
| Chang Liver | ATCC   | CCL-13™       |
| Hep-3B      | ATCC   | HB-8064™      |
| Hep-G2      | ATCC   | HB-8065™      |
| SK-Hep      | ATCC   | HTB-52™       |
| SK-MEL5     | ATCC   | HTB-70™       |
| RPMI-7951   | ATCC   | HTB-66™       |
| HL-60       | ATCC   | CCL-240™      |
| Raw264.7    | ATCC   | TIB-71™       |
| HUVEC       | BCRC   | H-UV001       |

\*ATCC: American Type Culture Collection

\*BCRC: Bioresource Collection and Research Center

Supplementary Table 3 Primer list

| mFc-fusion protein                               | Primer          | Sequence (5' → 3')                                 | Enzyme  |
|--------------------------------------------------|-----------------|----------------------------------------------------|---------|
| GPR56 <sup>F</sup> -mFc                          | Forward         | AAT <u>AAGCTT</u> ACAGGTGGTGACTTCCAAGAGT           | HinDIII |
|                                                  | Reverse         | AAGCGGGCCGCACCTCCACCGAGGAGACCA                     | NotI    |
| CD177-mFc                                        | Forward         | AGTCCAGTGTGGT <u>GGAATTC</u>                       | EcoRI   |
|                                                  | Reverse         | AAAGCGGGCCGCTGAGAGGCAGGAGGCTGC                     | NotI    |
| GPR97 <sup>E</sup> -mFc                          | Forward         | AT <u>GAAATTC</u> TAAGCTTGGTACTCAATTCGAAGG         | EcoRI   |
|                                                  | Reverse         | TAGCGGGCCGCCTGTGAGGATATGCACCGT                     | NotI    |
| GPR56 <sup>PL</sup> /GPR97 <sup>GAIN</sup> -mFc  | Forward (GPR56) | T7 primer: TAATACGACTCACTATAGGG                    |         |
|                                                  | Reverse (GPR56) | GTCCACCGAGGCATTGTGAG                               |         |
|                                                  | Forward (GPR97) | CACACGGCCGCTCACAATGCCTCGGTGGACAATGTGGAAAACCTGCAGAG |         |
|                                                  | Reverse (GPR97) | CATTGTGACACTCCTTGCAT for mFc sequence              |         |
| GPR97 <sup>NTD</sup> /GPR56 <sup>GAIN</sup> -mFc | Forward (GPR97) | T7 primer: TAATACGACTCACTATAGGG                    |         |
|                                                  | Reverse (GPR97) | GTGAGCGGCCGTGTGGGGAGGACTGTGGAAGCAGGAGTCGCTGCCCGACT |         |
|                                                  | Forward (GPR56) | TTCCACAGTCCTCCCCACAC                               |         |
|                                                  | Reverse (GPR56) | CATTGTGACACTCCTTGCAT for mFc sequence              |         |
| GPR97 <sup>NTD</sup> -mFc                        | Forward         | T7 primer: TAATACGACTCACTATAGGG                    |         |
|                                                  | Reverse         | AAGCGGGCCGCATTGCAGGAGTCGCTGCCCG                    | NotI    |
| GPR97 <sup>NTD-A</sup> -mFc                      | Forward         | T7 primer: TAATACGACTCACTATAGGG                    |         |
|                                                  | R-primer        | AAGCGGGCCGCTTCCTTCATCAGATGGGCCT                    | NotI    |
| GPR97 <sup>GAIN</sup> -mFc                       | Forward         | AATGTGGAAAACCTGCAGAGATACTGGCTAACTACGAGG            |         |
|                                                  | R-primer        | CTCTGCAAGTTTTCCACATTCTGACCTGAGGTCGGGAGCA           |         |



**Supplementary Table 4 Crystallographic statistics of GPR97-ECR**

| DATA COLLECTION                                                   |                                   |                                   |
|-------------------------------------------------------------------|-----------------------------------|-----------------------------------|
|                                                                   | Native                            | S-SAD                             |
| Source                                                            | ID30B (ESRF)                      | I23 (DLS)                         |
| Wavelength $\lambda$ (Å)                                          | 0.97625                           | 2.7552                            |
| No. of crystals                                                   | 1                                 | 1                                 |
| Resolution (Å)                                                    | 96.28-3.37<br>(3.64-3.37)         | 172.68-3.50<br>(3.83-3.50)        |
| Space group                                                       | P 4 <sub>3</sub> 2 <sub>1</sub> 2 | P 4 <sub>3</sub> 2 <sub>1</sub> 2 |
| Cell dimensions<br>a, b, c (Å); $\alpha$ , $\beta$ , $\gamma$ (°) | 96.3, 96.3, 172.4<br>90, 90, 90   | 95.9, 95.9, 172.7<br>90, 90, 90   |
| Unique reflections                                                | 12030 (2398)                      | 10793 (2519)                      |
| Multiplicity                                                      | 11.6 (12.2)                       | 22.8 (21.0)                       |
| Completeness (%)                                                  | 99.7 (99.4)                       | 100 (100)                         |
| Wilson B (Å <sup>2</sup> )                                        | 103.06                            | 140.66                            |
| R <sub>merge</sub> (%)                                            | 27.3 (123.8)                      | 22.5 (359.3)                      |
| R <sub>meas</sub> (%)                                             | 28.6 (129.2)                      | 23.0 (368.3)                      |
| R <sub>pim</sub> (%)                                              | 8.3 (36.4)                        | 4.8 (79.8)                        |
| CC <sub>1/2</sub> (%)                                             | 99.6 (52.1)                       | 99.9 (61.6)                       |
| Average I/ $\sigma$ (I)                                           | 6.5 (1.9)                         | 9.9 (0.9)                         |

Values in parenthesis are for the highest resolution shell

| REFINEMENT                                |               |
|-------------------------------------------|---------------|
| Resolution (Å)                            | 84.11-3.37    |
| Reflections (Work / Free set)             | 10967 / 1040  |
| R <sub>work</sub> / R <sub>free</sub> (%) | 26.59 / 31.30 |
| No. of atoms (protein)                    | 3640          |
| Mean B value (Å <sup>2</sup> ) (protein)  | 134.5         |
| R.m.s.d. bonds (Å)                        | 0.005         |
| R.m.s.d. angles (°)                       | 1.229         |
| Ramachandran                              |               |
| Favoured (%)                              | 94.3          |
| Allowed (%)                               | 5.7           |
| Outliers (%)                              | 0.00          |
| Molprobit score / percentile              | 2.03          |

R<sub>merge</sub>: merging R-factor

R<sub>meas</sub>: multiplicity-corrected merging R-factor

R<sub>pim</sub>: precision-indicating merging R-factor

CC<sub>1/2</sub>: correlation coefficients between random half data sets

R.m.s.d.: root mean square deviation from ideal geometry
